# Supplementary material
Source: PubMed Central journal article supplement (PMC7680285)
Supplement: NIHMS1599124-supplement-1.pdf [file NIHMS1599124-supplement-1.pdf]

## Supplementary Table 1

## Data Entry Form

|                                                                              |  |
|------------------------------------------------------------------------------|--|
| Authors                                                                      |  |
| Year                                                                         |  |
| Journal                                                                      |  |
| Funding source                                                               |  |
| Sample size                                                                  |  |
| Nature of sample                                                             |  |
| % of those approached who participated                                       |  |
| Inclusion/Exclusion Criteria                                                 |  |
| % excluded                                                                   |  |
| Where recruited                                                              |  |
| Length of time since trauma (days)                                           |  |
| Intervention description                                                     |  |
| Control description (note matching to intervention in terms of timing, etc.) |  |
| Types of blinding (if any)*                                                  |  |
| Setting                                                                      |  |
| Length of follow-up                                                          |  |
| Design type (e.g., RCT?)                                                     |  |
| % dropped out/lost to follow-up*                                             |  |
| PTSD measure                                                                 |  |
| Additional measures                                                          |  |

|                                                                                             |  |
|---------------------------------------------------------------------------------------------|--|
| Type of Analysis/Was it intent to treat?*                                                   |  |
| Trial stopped early?*                                                                       |  |
| <i>M</i> (SD) for active and control group on treatment outcomes at all reported follow-ups |  |
| Effect type and 95% CIs                                                                     |  |
| Effectiveness – any information about acceptability for pts, providers, etc?                |  |
| Adverse effects?                                                                            |  |
| Failure to report certain outcomes?*                                                        |  |
| Conclusions                                                                                 |  |
| Limitations                                                                                 |  |
| Risk of bias? (any failure to report variables with asterisk)                               |  |

Supplementary Table 2

Summary of studies included.

| <b>Citation</b>       | <b>Design</b>                      | <b>Participants</b>                                                                           | <b>Setting &amp; Location</b>                             | <b>Intervention</b>                                                                | <b>Control</b>                         | <b>Outcomes</b>                                                                                                        |
|-----------------------|------------------------------------|-----------------------------------------------------------------------------------------------|-----------------------------------------------------------|------------------------------------------------------------------------------------|----------------------------------------|------------------------------------------------------------------------------------------------------------------------|
| Acierno et al., 2003  | RCT                                | 15+ years old within 72 hours of reporting rape ( <i>N</i> = 226)                             | Emergency Department; United States                       | Video intervention (17 minutes) including medical prep and psychoeducation         | Treatment as usual                     | 6-week: alcohol and marijuana use                                                                                      |
| Foa, et al., 1995     | Participants matched               | 16+ years old with recent assault and PTSD diagnosis ( <i>N</i> = 20)                         | Research and treatment center; Northeastern United States | Brief prevention program: 4 (2 hour) weekly meetings                               | Assessment only                        | 2 months and 5.5 months post-assault: PSS-I, PSS-SR, SAI, BDI                                                          |
| Foa et al., 2006      | RCT                                | Women with recent SA meeting DSM-IV symptom criteria for PTSD (not duration) ( <i>N</i> = 90) | Research and treatment center; Northeastern United States | Brief cognitive behavioral intervention: 4 (2 hour) weekly meetings                | Assessment only; Supportive counseling | Post-treatment, 2-, 3-, 6-, 9-, and 12-month: PSS-I, PSS-SR, BDI, BAI, ETO (Foa, Rothbaum, Riggs, & Murdock, 1991)     |
| Frank et al., 1988    | RCT                                | Treatment seeking women experiencing recent SA ( <i>N</i> = 84)                               | Research and treatment center; Northeastern United States | Systematic desensitization (14-session) or cognitive behavior therapy (14-session) | Non-victimized control group           | Post-treatment: BDI, STAI, Fear Survey Schedule; Feelings of Inadequacy Scale (Church, Truss, & Velicer, 1980); SAS-II |
| Gilmore et al., 2019a | Usability and qualitative analysis | Adult women experiencing recent SA seeking SAMFE                                              | SAMFE centers; Southeastern United States                 | mHealth intervention focused on alcohol and substance use; suicide                 | None                                   | Post-assault PHQ-2 (Löwe, Kroenke, &                                                                                   |

|                          |             |                                                                                           |                                         |                                                                                                                                                                                                                                                                                               |                    |                                                                                                  |
|--------------------------|-------------|-------------------------------------------------------------------------------------------|-----------------------------------------|-----------------------------------------------------------------------------------------------------------------------------------------------------------------------------------------------------------------------------------------------------------------------------------------------|--------------------|--------------------------------------------------------------------------------------------------|
|                          |             | care ( $n = 13$ ) and community providers ( $n = 25$ )                                    | United States                           | prevention; PTSD and depression; coping skills, physical health; referral to community resources                                                                                                                                                                                              |                    | Gräfe, 2005); PCL-5; AUDIT-C (Saunders, Aasland, Babor, De la Fuente, & Grant, 1993)             |
| Gilmore et al., 2019b    | RCT         | Adolescent and adult women experiencing recent SA presenting for SAMFE care ( $N = 154$ ) | SAMFE centers; Midwestern United Sites  | Video intervention (9 or 18 minutes) including psychoeducation only (9 minute) or medical prep and psychoeducation (18 minutes); Video intervention (9 or 18 minutes) providing relaxation techniques only (e.g., diaphragm breathing) or medical prep and relaxation techniques (18 minutes) | Treatment as usual | 1.5-month: Prescription opioid misuse and non-medical use of prescription medication             |
| Gilmore et al., in press | RCT         | Women experiencing recent SA (age 15+) receiving SAMFE care ( $N = 233$ )                 | SAMFE centers; Midwestern United States | Video intervention (9 or 18 minutes) including psychoeducation only (9 minute) or medical prep and psychoeducation (18 minutes); Video intervention (9 or 18 minutes) providing relaxation techniques only (e.g., diaphragm breathing) or medical prep and relaxation techniques (18 minutes) | Treatment as usual | 1.5-, 3-, and 6-month: PDS, Perceived Control over Stressful Events Scale (Frazier et al., 2011) |
| Hassija &                | Case series | Women referred from                                                                       | Telehealth rural                        | Prolonged exposure or                                                                                                                                                                                                                                                                         | None               | Post-treatment:                                                                                  |

|                      |                                                    |                                                                                                                 |                                                  |                                                                                                                   |                                 |                                                                                                 |
|----------------------|----------------------------------------------------|-----------------------------------------------------------------------------------------------------------------|--------------------------------------------------|-------------------------------------------------------------------------------------------------------------------|---------------------------------|-------------------------------------------------------------------------------------------------|
| Gray,<br>2011        |                                                    | rape crisis center ( $N = 15$ )                                                                                 | clinic; Western United States                    | cognitive processing therapy (avg. 13 sessions)                                                                   |                                 | PCL, CES-D                                                                                      |
| Miller et al., 2015  | RCT                                                | Adult women experiencing recent SA presenting for SAMFE care ( $N = 164$ )                                      | SAMFE centers; United States                     | Video intervention (9 minutes) including psychoeducation only                                                     | Treatment as usual              | 2-week & 2-month: PSS-SR, STAI-S, SUDs                                                          |
| Nixon et al., 2016   | RCT                                                | Adult women experiencing past month SA with Acute Stress Disorder ( $N = 47$ )                                  | Rape crisis center; United States                | Cognitive processing therapy (6 sessions)                                                                         | Treatment as usual (6 sessions) | 3-, 6-, and 12-month CAPS and BDI                                                               |
| Resnick et al., 1999 | Pseudo-randomized                                  | Adult women experiencing recent SA presenting to emergency department within 72 hours post-assault ( $N = 48$ ) | Emergency department; United States              | Video intervention (17 minutes) including medical prep and psychoeducation                                        | Treatment as usual              | Post-treatment: SUDS, BAI<br>6-week: PSS-SR, BAI                                                |
| Resnick et al., 2005 | RCT                                                | 15+ years old girls and women experiencing recent SA presenting for SAMFE care ( $N = 205$ )                    | Emergency department; United States              | Video intervention (17 minutes) including medical prep and psychoeducation                                        | Treatment as usual              | Post-treatment: SUDS, BAI<br>6-week: PSS-SR, BDI, PILL, BAI, assessment of alcohol and drug use |
| Resnick et al., 2007 | Randomized with dismantling conditions added half- | 14+ years old girls and women experiencing recent SA presenting for SAMFE care ( $N =$                          | Emergency department; Southeastern United States | Video interventions (17 mins) including medical prep and psychoeducation; medical prep only; psychoeducation only | Treatment as usual              | Targeted follow-ups for 6 weeks and 6 months with considerable timing variability;              |

|                        | way through trial  | 406)                                                                                                 |                                                  |                                                                                                                                                                                                                                                                                               |                    | Reported marijuana use outcomes                                                                                                                 |
|------------------------|--------------------|------------------------------------------------------------------------------------------------------|--------------------------------------------------|-----------------------------------------------------------------------------------------------------------------------------------------------------------------------------------------------------------------------------------------------------------------------------------------------|--------------------|-------------------------------------------------------------------------------------------------------------------------------------------------|
| Rothbaum et al., 2012  | RCT                | Individuals presenting to the Emergency Department meeting DSM-IV PTSD criterion A ( <i>N</i> = 137) | Emergency department; Southeastern United States | Modified prolonged exposure: 3 (1hr) weekly sessions                                                                                                                                                                                                                                          | Assessment only    | 4-week: PSS-I, BDI, PDS<br>12-week: PSS-I                                                                                                       |
| Tarquinio et al., 2012 | Uncontrolled trial | Women within 24-72 hours after first-time sexual assault ( <i>N</i> = 17)                            | Research center; France                          | Newly developed eye movement desensitization and reprocessing (EMDR) urgent/emergency intervention (URG-EMDR)                                                                                                                                                                                 | None               | 4-week and 6-month; IES (Horowitz et al., 1979); measures of sexuality; SUDS during treatment                                                   |
| Walsh et al., 2017     | RCT                | Women experiencing recent SA (age 15+) receiving SAMFE care ( <i>N</i> = 233)                        | SAMFE centers; Midwestern United States          | Video intervention (9 or 18 minutes) including psychoeducation only (9 minute) or medical prep and psychoeducation (18 minutes); Video intervention (9 or 18 minutes) providing relaxation techniques only (e.g., diaphragm breathing) or medical prep and relaxation techniques (18 minutes) | Treatment as usual | Pre- and post-exam: PANAS-NA (Watson, Clark, & Tellegen, 1988); 1.5-, 3-, and 6-month: AUDIT, self-reported marijuana use, DAST (Skinner, 1982) |
| Zohar et al., 2018     | RCT                | Adults with past-month trauma and reporting >2 DSM-IV                                                | Medical center and home-based                    | Escitalopram (titrated 10mg-20mg/day) up to 24 weeks                                                                                                                                                                                                                                          | Placebo            | Post-treatment: CAPS, PSS-SR, PSQI, MADRAS,                                                                                                     |

---

|                                                       |                                          |                                     |
|-------------------------------------------------------|------------------------------------------|-------------------------------------|
| criteria for acute<br>stress disorder ( $N =$<br>353) | treatment;<br>Israel and South<br>Africa | VAS depression,<br>VAS anxiety, CGI |
|-------------------------------------------------------|------------------------------------------|-------------------------------------|

---

*Note.* BAI = Beck Anxiety Inventory; BDI = Beck Depression Inventory; CAPS = Clinician-Administered-PTSD Scale; CES-D = Center for Epidemiological Studies-Depression Scale; CGI = Clinical Global Impression; DAST = Drug Abuse Screening Test; DSM-IV = Diagnostic and Statistical Manual – 4<sup>th</sup> Edition; ETO = Expectancy of Therapeutic Outcome; IES = Impact of Events Scale; MADRAS = Montgomery-Asberg Depression Rating Scale; PANAS-NA = Positive and Negative Affect Schedule – Negative Affect subscale; PCL = PTSD Checklist; PDS = Posttraumatic Diagnostic Scale; PILL = Pennebaker Inventory of Limbic Languidness; PSS-I = PTSD Symptom Scale-Interview; PSS-SR = PTSD Symptom Scale-Self Report; PSQI = Pittsburgh Sleep Quality Index; PTSD = Posttraumatic Stress Disorder; RCT = Randomized Controlled Trial; SAI = Standardized Assault Interview; SAS-II = Social Adjustment Scale II; SAMFE = Sexual assault medical and forensic exam; STAI = State Trait Anxiety Inventory; SUDS = Subjective Units of Discomfort Scales; VAS = Visual Analogue Scale.
